# Supplementary material for: Quantum mechanical studies of p-azoxyanisole and identification of its electro-optic activity
Source: Royal Society of Chemistry journal article supplement (doi:10.1039/d3cp00084b), 2023-01-01
Supplement: d3cp00084b1.pdf [file d3cp00084b1.pdf]

## ***Quantum Mechanical studies of p-Azoxyanisole and identification of its Electro-optic Activity***

Manish Kumar <sup>a</sup>, Mirtunjai Mishra <sup>a</sup>, Devesh Kumar<sup>\*ab</sup>, Devendra Singh<sup>\*a</sup>

<sup>a</sup> Department of Physics, School of Physical & Decision Science, Babasaheb Bhimrao Ambedkar University, Lucknow-226025 Uttar Pradesh, India.

<sup>b</sup> Department of Physics, Siddharth University, Kapilvastu, Siddharth Nagar-272202, Uttar Pradesh, India.

\*Corresponding author (E-mail: [dkclcre@yahoo.com](mailto:dkclcre@yahoo.com); [devendras193@gmail.com](mailto:devendras193@gmail.com))

### **1. Bond alteration**

**Table S1:** - Bond length alteration for B3LYP functional combined with different basis sets.

| Sr. No. | Bond    | Bond Length (Å) |          |          |
|---------|---------|-----------------|----------|----------|
|         |         | 6-31G**         | 6-311G   | 6-311G** |
| 1       | C1-C2   | 1.392974        | 1.395297 | 1.391362 |
| 2       | C1-C6   | 1.402182        | 1.401637 | 1.400274 |
| 3       | C1-H7   | 1.082977        | 1.079030 | 1.081150 |
| 4       | C2-C3   | 1.392963        | 1.394922 | 1.390130 |
| 5       | C2-H8   | 1.081986        | 1.077404 | 1.080050 |
| 6       | C3-C4   | 1.397338        | 1.399777 | 1.395744 |
| 7       | C3-N16  | 1.458148        | 1.455873 | 1.462219 |
| 8       | C4-C5   | 1.385213        | 1.387538 | 1.382937 |
| 9       | C4-H9   | 1.082110        | 1.077442 | 1.080271 |
| 10      | C5-C6   | 1.402986        | 1.402218 | 1.401332 |
| 11      | C5-H10  | 1.084545        | 1.079574 | 1.082672 |
| 12      | C6-O11  | 1.360322        | 1.386997 | 1.357736 |
| 13      | O11-C12 | 1.420785        | 1.453477 | 1.422246 |
| 14      | C12-H13 | 1.097356        | 1.091871 | 1.095531 |
| 15      | C12-H14 | 1.090873        | 1.084274 | 1.088635 |
| 16      | C12-H15 | 1.097366        | 1.091689 | 1.095497 |
| 17      | N16-N17 | 1.281264        | 1.294801 | 1.277810 |
| 18      | N16-O18 | 1.263056        | 1.310720 | 1.257703 |
| 19      | N17-C24 | 1.396218        | 1.404484 | 1.395235 |
| 20      | C19-C20 | 1.388262        | 1.389608 | 1.386612 |
| 21      | C19-C24 | 1.409054        | 1.410843 | 1.406853 |
| 22      | C19-H25 | 1.085059        | 1.080318 | 1.083236 |
| 23      | C20-C21 | 1.402121        | 1.402938 | 1.400684 |

|    |         |          |          |          |
|----|---------|----------|----------|----------|
| 24 | C20-H26 | 1.083309 | 1.079394 | 1.081479 |
| 25 | C21-C22 | 1.401988 | 1.401031 | 1.400019 |
| 26 | C21-O29 | 1.362199 | 1.387433 | 1.359429 |
| 27 | C22-C23 | 1.386272 | 1.388333 | 1.383805 |
| 28 | C22-H27 | 1.085210 | 1.080153 | 1.083435 |
| 29 | C23-C24 | 1.416771 | 1.418625 | 1.415895 |
| 30 | C23-H28 | 1.078050 | 1.073838 | 1.075990 |
| 31 | O29-C30 | 1.419798 | 1.452869 | 1.421291 |
| 32 | C30-H31 | 1.090814 | 1.084428 | 1.088625 |
| 33 | C30-H32 | 1.097295 | 1.091954 | 1.095650 |
| 34 | C30-H33 | 1.097260 | 1.091813 | 1.095554 |

**Table S2:** - Bond length alteration for M06L functional combined with different basis sets.

| Sr. No. | Bond    | Bond Length (Å) |        |          |
|---------|---------|-----------------|--------|----------|
|         |         | 6-31G**         | 6-311G | 6-311G** |
| 1       | C1-C2   | 1.3887          | 1.3927 | 1.39     |
| 2       | C1-C6   | 1.3997          | 1.4022 | 1.4006   |
| 3       | C1-H7   | 1.0844          | 1.0835 | 1.0861   |
| 4       | C2-C3   | 1.3914          | 1.3955 | 1.3921   |
| 5       | C2-H8   | 1.0827          | 1.0816 | 1.0843   |
| 6       | C3-C4   | 1.3953          | 1.3995 | 1.3962   |
| 7       | C3-N16  | 1.4517          | 1.4509 | 1.4545   |
| 8       | C4-C5   | 1.3822          | 1.3865 | 1.3834   |
| 9       | C4-H9   | 1.0831          | 1.0819 | 1.0849   |
| 10      | C5-C6   | 1.4005          | 1.4024 | 1.4013   |
| 11      | C5-H10  | 1.085           | 1.0831 | 1.0866   |
| 12      | C6-O11  | 1.3564          | 1.3832 | 1.3558   |
| 13      | O11-C12 | 1.4136          | 1.4492 | 1.4130   |
| 14      | C12-H13 | 1.0974          | 1.0954 | 1.0992   |
| 15      | C12-H14 | 1.0894          | 1.0873 | 1.0909   |
| 16      | C12-H15 | 1.0973          | 1.0954 | 1.0992   |
| 17      | N16-N17 | 1.2895          | 1.3062 | 1.2884   |
| 18      | N16-O18 | 1.258           | 1.304  | 1.2517   |
| 19      | N17-C24 | 1.3883          | 1.3984 | 1.3892   |
| 20      | C19-C20 | 1.3845          | 1.3879 | 1.3857   |
| 21      | C19-C24 | 1.4076          | 1.4113 | 1.4084   |
| 22      | C19-H25 | 1.0861          | 1.0846 | 1.0877   |
| 23      | C20-C21 | 1.3994          | 1.4027 | 1.4004   |
| 24      | C20-H26 | 1.0843          | 1.0834 | 1.0861   |

|    |         |        |        |        |
|----|---------|--------|--------|--------|
| 25 | C21-C22 | 1.3995 | 1.4016 | 1.4004 |
| 26 | C21-O29 | 1.3581 | 1.3839 | 1.3575 |
| 27 | C22-C23 | 1.3832 | 1.3872 | 1.3843 |
| 28 | C22-H27 | 1.0859 | 1.0840 | 1.0875 |
| 29 | C23-C24 | 1.4161 | 1.4195 | 1.4171 |
| 30 | C23-H28 | 1.0791 | 1.0787 | 1.0809 |
| 31 | O29-C30 | 1.4123 | 1.4486 | 1.4117 |
| 32 | C30-H31 | 1.0898 | 1.0876 | 1.0913 |
| 33 | C30-H32 | 1.0976 | 1.0955 | 1.0995 |
| 34 | C30-H33 | 1.0977 | 1.0955 | 1.0995 |

**Table S3:** - Bond length alteration for M06-2X functional combined with different basis sets.

| Sr. No. | Bond    | Bond Length (Å) |          |          |
|---------|---------|-----------------|----------|----------|
|         |         | 6-31G**         | 6-311G   | 6-311G** |
| 1       | C1-C2   | 1.390779        | 1.392794 | 1.389405 |
| 2       | C1-C6   | 1.397983        | 1.396580 | 1.396121 |
| 3       | C1-H7   | 1.082583        | 1.078453 | 1.080853 |
| 4       | C2-C3   | 1.387029        | 1.388819 | 1.384491 |
| 5       | C2-H8   | 1.082183        | 1.077414 | 1.080147 |
| 6       | C3-C4   | 1.392913        | 1.394935 | 1.390967 |
| 7       | C3-N16  | 1.459011        | 1.452301 | 1.462217 |
| 8       | C4-C5   | 1.382080        | 1.384247 | 1.380129 |
| 9       | C4-H9   | 1.082153        | 1.077284 | 1.080430 |
| 10      | C5-C6   | 1.399665        | 1.397427 | 1.398082 |
| 11      | C5-H10  | 1.083957        | 1.078812 | 1.081993 |
| 12      | C6-O11  | 1.353704        | 1.379731 | 1.351534 |
| 13      | O11-C12 | 1.412205        | 1.442308 | 1.412799 |
| 14      | C12-H13 | 1.096120        | 1.090884 | 1.093757 |
| 15      | C12-H14 | 1.089128        | 1.083120 | 1.087232 |
| 16      | C12-H15 | 1.096029        | 1.090748 | 1.093946 |
| 17      | N16-N17 | 1.264209        | 1.276771 | 1.261394 |
| 18      | N16-O18 | 1.249089        | 1.298174 | 1.244720 |
| 19      | N17-C24 | 1.402346        | 1.408983 | 1.401779 |
| 20      | C19-C20 | 1.385993        | 1.387150 | 1.384743 |
| 21      | C19-C24 | 1.401956        | 1.403039 | 1.400078 |
| 22      | C19-H25 | 1.084950        | 1.079794 | 1.082949 |
| 23      | C20-C21 | 1.397493        | 1.398101 | 1.396517 |
| 24      | C20-H26 | 1.083003        | 1.078772 | 1.080783 |
| 25      | C21-C22 | 1.397321        | 1.395220 | 1.395231 |
| 26      | C21-O29 | 1.356053        | 1.380603 | 1.353658 |
| 27      | C22-C23 | 1.384433        | 1.386593 | 1.382537 |

|    |         |          |          |          |
|----|---------|----------|----------|----------|
| 28 | C22-H27 | 1.084630 | 1.079365 | 1.082809 |
| 29 | C23-C24 | 1.410832 | 1.412137 | 1.410227 |
| 30 | C23-H28 | 1.077565 | 1.073177 | 1.075524 |
| 31 | O29-C30 | 1.410511 | 1.441698 | 1.411976 |
| 32 | C30-H31 | 1.089287 | 1.083305 | 1.087479 |
| 33 | C30-H32 | 1.096508 | 1.091019 | 1.094740 |
| 34 | C30-H33 | 1.096269 | 1.090878 | 1.094806 |

**Table S4:** - Bond angle alteration for B3LYP functional combined with different basis sets.

| Sr. No. | Bond        | Bond Angle (in Degree) |            |            |
|---------|-------------|------------------------|------------|------------|
|         |             | 6-31G**                | 6-311G     | 6-311G**   |
| 1       | C6-C1-C2    | 119.892477             | 119.707236 | 119.942180 |
| 2       | H7-C1-C2    | 119.088349             | 119.161638 | 118.978418 |
| 3       | H7-C1-C6    | 121.019114             | 121.131082 | 121.079170 |
| 4       | C3-C2-C1    | 119.782662             | 119.714089 | 119.866903 |
| 5       | H8-C2-C1    | 120.758629             | 120.921521 | 120.759055 |
| 6       | H8-C2-C3    | 119.458706             | 119.364389 | 119.374040 |
| 7       | C4-C3-C2    | 120.670788             | 120.766862 | 120.556320 |
| 8       | N16-C3-C2   | 121.594590             | 121.184420 | 121.557633 |
| 9       | N16-C3-C4   | 117.734607             | 118.048717 | 117.886019 |
| 10      | C5-C4-C3    | 119.606874             | 119.538209 | 119.649597 |
| 11      | H9-C4-C3    | 118.873923             | 118.852369 | 118.813721 |
| 12      | H9-C4-C5    | 121.519185             | 121.609420 | 121.536681 |
| 13      | C6-C5-C4    | 120.313393             | 120.122153 | 120.401163 |
| 14      | H10-C5-C4   | 121.096569             | 121.297037 | 121.107471 |
| 15      | H10-C5-C6   | 118.590006             | 118.580801 | 118.491203 |
| 16      | C5-C6-C1    | 119.733693             | 120.151442 | 119.583730 |
| 17      | O11-C6-C1   | 124.669267             | 124.365065 | 124.665636 |
| 18      | O11-C6-C5   | 115.597009             | 115.483492 | 115.750624 |
| 19      | C12-O11-C6  | 118.549189             | 119.384903 | 118.783698 |
| 20      | H13-C12-O11 | 111.594126             | 111.180295 | 111.436642 |
| 21      | H14-C12-O11 | 105.937725             | 105.016958 | 105.722390 |
| 22      | H14-C12-H13 | 109.257258             | 109.712295 | 109.302506 |
| 23      | H15-C12-O11 | 111.555411             | 111.173704 | 111.446538 |
| 24      | H15-C12-H13 | 109.182559             | 109.926715 | 109.540355 |
| 25      | H15-C12-H14 | 109.229815             | 109.719271 | 109.295076 |
| 26      | N17-N16-C3  | 115.445723             | 116.502259 | 115.565484 |
| 27      | O18-N16-C3  | 116.859953             | 116.864220 | 116.840519 |
| 28      | O18-N16-N17 | 127.694292             | 126.633507 | 127.593682 |
| 29      | C24-N17-N16 | 121.425747             | 122.370526 | 121.560839 |
| 30      | C24-C19-C20 | 122.075484             | 121.605723 | 122.044702 |

|    |             |            |            |            |
|----|-------------|------------|------------|------------|
| 31 | H25-C19-C20 | 120.089826 | 120.539114 | 120.057071 |
| 32 | H25-C19-C24 | 117.834684 | 117.855161 | 117.898217 |
| 33 | C21-C20-C19 | 119.273498 | 119.233474 | 119.417519 |
| 34 | H26-C20-C19 | 119.509287 | 119.547816 | 119.355804 |
| 35 | H26-C20-C21 | 121.217154 | 121.218684 | 121.226470 |
| 36 | C22-C21-C20 | 119.463193 | 119.983816 | 119.309894 |
| 37 | O29-C21-C20 | 124.723209 | 124.348802 | 124.763565 |
| 38 | O29-C21-C22 | 115.813592 | 115.667376 | 115.926536 |
| 39 | C23-C22-C21 | 121.243373 | 120.887765 | 121.295108 |
| 40 | H27-C22-C21 | 118.205008 | 118.302198 | 118.160869 |
| 41 | H27-C22-C23 | 120.551619 | 120.810035 | 120.544018 |
| 42 | C24-C23-C22 | 120.014321 | 119.870437 | 120.095258 |
| 43 | H28-C23-C22 | 120.225639 | 120.590107 | 120.238080 |
| 44 | H28-C23-C24 | 119.760039 | 119.539455 | 119.666641 |
| 45 | C19-C24-N17 | 112.768693 | 112.905289 | 113.022592 |
| 46 | C23-C24-N17 | 129.301201 | 128.675922 | 129.139888 |
| 47 | C23-C24-C19 | 117.930047 | 118.418777 | 117.837374 |
| 48 | C30-O29-C21 | 118.428887 | 119.385524 | 118.717592 |
| 49 | H31-C30-O29 | 105.984683 | 105.039602 | 105.784168 |
| 50 | H32-C30-O29 | 111.643688 | 111.204777 | 111.467700 |
| 51 | H32-C30-H31 | 109.216996 | 109.720591 | 109.296733 |
| 52 | H33-C30-O29 | 111.637628 | 111.208253 | 111.476716 |
| 53 | H33-C30-H31 | 109.167931 | 109.696737 | 109.268482 |
| 54 | H33-C30-H32 | 109.104740 | 109.862853 | 109.453414 |

**Table S5:** - Bond angle alteration for M06L functional combined with different basis sets.

| Sr. No. | Bond      | Bond Angle (in Degree) |          |          |
|---------|-----------|------------------------|----------|----------|
|         |           | 6-31G**                | 6-311G   | 6-311G** |
| 1       | C6-C1-C2  | 119.8698               | 119.6103 | 119.8839 |
| 2       | H7-C1-C2  | 119.2246               | 119.3544 | 119.2372 |
| 3       | H7-C1-C6  | 120.9055               | 121.0353 | 120.8789 |
| 4       | C3-C2-C1  | 119.8372               | 119.6188 | 119.8302 |
| 5       | H8-C2-C1  | 120.8379               | 121.1274 | 120.8804 |
| 6       | H8-C2-C3  | 119.3249               | 119.2538 | 119.2894 |
| 7       | C4-C3-C2  | 120.5947               | 120.9643 | 120.6022 |
| 8       | N16-C3-C2 | 121.4826               | 120.9866 | 121.5005 |
| 9       | N16-C3-C4 | 117.9227               | 118.0492 | 117.8973 |
| 10      | C5-C4-C3  | 119.6485               | 119.4667 | 119.6371 |
| 11      | H9-C4-C3  | 118.7832               | 118.8292 | 118.7786 |
| 12      | H9-C4-C5  | 121.5683               | 121.7041 | 121.5842 |
| 13      | C6-C5-C4  | 120.2536               | 119.9588 | 120.2727 |

|    |             |          |          |          |
|----|-------------|----------|----------|----------|
| 14 | H10-C5-C4   | 121.2292 | 121.4401 | 121.2565 |
| 15 | H10-C5-C6   | 118.5171 | 118.601  | 118.4708 |
| 16 | C5-C6-C1    | 119.7962 | 120.3811 | 119.7740 |
| 17 | O11-C6-C1   | 124.3716 | 124.0569 | 124.3934 |
| 18 | O11-C6-C5   | 115.8322 | 115.562  | 115.8327 |
| 19 | C12-O11-C6  | 117.1996 | 117.6739 | 117.2047 |
| 20 | H13-C12-O11 | 111.6201 | 111.0461 | 111.6836 |
| 21 | H14-C12-O11 | 106.1687 | 105.0504 | 106.2291 |
| 22 | H14-C12-H13 | 109.2732 | 109.9722 | 109.2334 |
| 23 | H15-C12-O11 | 111.6129 | 111.0443 | 111.6787 |
| 24 | H15-C12-H13 | 108.8196 | 109.6707 | 108.7119 |
| 25 | H15-C12-H14 | 109.2813 | 109.9729 | 109.2393 |
| 26 | N17-N16-C3  | 114.8254 | 115.6391 | 114.7027 |
| 27 | O18-N16-C3  | 117.1746 | 117.2041 | 117.2729 |
| 28 | O18-N16-N17 | 128.0    | 127.1567 | 128.0244 |
| 29 | C24-N17-N16 | 120.669  | 121.4362 | 120.6471 |
| 30 | C24-C19-C20 | 122.2867 | 121.7611 | 122.3034 |
| 31 | H25-C19-C20 | 120.1964 | 120.6952 | 120.2049 |
| 32 | H25-C19-C24 | 117.5169 | 117.5437 | 117.4917 |
| 33 | C21-C20-C19 | 119.1437 | 119.0025 | 119.155  |
| 34 | H26-C20-C19 | 119.5874 | 119.6966 | 119.5822 |
| 35 | H26-C20-C21 | 121.2688 | 121.3009 | 121.2628 |
| 36 | C22-C21-C20 | 119.5144 | 120.1844 | 119.4784 |
| 37 | O29-C21-C20 | 124.5805 | 124.1944 | 124.6131 |
| 38 | O29-C21-C22 | 115.9051 | 115.6212 | 115.9085 |
| 39 | C23-C22-C21 | 121.326  | 120.8603 | 121.3535 |
| 40 | H27-C22-C21 | 118.1028 | 118.2418 | 118.0536 |
| 41 | H27-C22-C23 | 120.5712 | 120.8979 | 120.5929 |
| 42 | C24-C23-C22 | 119.9562 | 119.763  | 119.9574 |
| 43 | H28-C23-C22 | 119.992  | 120.4663 | 120.0184 |
| 44 | H28-C23-C24 | 120.0518 | 119.7708 | 120.0242 |
| 45 | C19-C24-N17 | 112.2347 | 112.1213 | 112.2192 |
| 46 | C23-C24-N17 | 129.9923 | 129.4501 | 130.0284 |
| 47 | C23-C24-C19 | 117.773  | 118.4286 | 117.7523 |
| 48 | C30-O29-C21 | 117.1756 | 117.7428 | 117.1924 |
| 49 | H31-C30-O29 | 106.2045 | 105.0608 | 106.2627 |
| 50 | H32-C30-O29 | 111.6893 | 111.0658 | 111.7579 |
| 51 | H32-C30-H31 | 109.216  | 109.967  | 109.1719 |
| 52 | H33-C30-O29 | 111.7121 | 111.0774 | 111.777  |
| 53 | H33-C30-H31 | 109.2129 | 109.9739 | 109.1701 |
| 54 | H33-C30-H32 | 108.7378 | 109.6148 | 108.6324 |

**Table S6:** - Bond angle alteration for M06-2X functional combined with different basis sets.

| Sr. No. | Bond        | Bond Angle (in Degree) |            |            |
|---------|-------------|------------------------|------------|------------|
|         |             | 6-31G**                | 6-311G     | 6-311G**   |
| 1       | C6-C1-C2    | 119.747342             | 119.593555 | 119.783732 |
| 2       | H7-C1-C2    | 119.138077             | 119.224132 | 118.986758 |
| 3       | H7-C1-C6    | 121.114360             | 121.182236 | 121.229197 |
| 4       | C3-C2-C1    | 119.550798             | 119.496950 | 119.642615 |
| 5       | H8-C2-C1    | 120.931109             | 121.055283 | 120.875000 |
| 6       | H8-C2-C3    | 119.518090             | 119.447759 | 119.482371 |
| 7       | C4-C3-C2    | 121.200653             | 121.204599 | 121.090448 |
| 8       | N16-C3-C2   | 121.192445             | 120.874701 | 121.177436 |
| 9       | N16-C3-C4   | 117.606902             | 117.920657 | 117.732070 |
| 10      | C5-C4-C3    | 119.268438             | 119.252214 | 119.301620 |
| 11      | H9-C4-C3    | 118.995551             | 118.941963 | 118.980512 |
| 12      | H9-C4-C5    | 121.735996             | 121.805823 | 121.717853 |
| 13      | C6-C5-C4    | 120.264759             | 120.080586 | 120.366730 |
| 14      | H10-C5-C4   | 121.358749             | 121.568261 | 121.342038 |
| 15      | H10-C5-C6   | 118.376401             | 118.351140 | 118.291094 |
| 16      | C5-C6-C1    | 119.967852             | 120.372086 | 119.814765 |
| 17      | O11-C6-C1   | 124.389652             | 124.031036 | 124.419230 |
| 18      | O11-C6-C5   | 115.642493             | 115.596865 | 115.765977 |
| 19      | C12-O11-C6  | 117.754774             | 118.760824 | 117.971819 |
| 20      | H13-C12-O11 | 111.269868             | 110.958798 | 111.092708 |
| 21      | H14-C12-O11 | 106.159277             | 105.416261 | 106.027568 |
| 22      | H14-C12-H13 | 109.411340             | 109.765993 | 109.420613 |
| 23      | H15-C12-O11 | 111.296131             | 110.986209 | 111.162836 |
| 24      | H15-C12-H13 | 109.267249             | 109.859903 | 109.580375 |
| 25      | H15-C12-H14 | 109.370869             | 109.76391  | 109.481408 |
| 26      | N17-N16-C3  | 115.568966             | 116.738901 | 115.633749 |
| 27      | O18-N16-C3  | 116.686440             | 116.738044 | 116.689169 |
| 28      | O18-N16-N17 | 127.744326             | 126.523005 | 127.677075 |
| 29      | C24-N17-N16 | 120.808408             | 122.054605 | 121.005809 |
| 30      | C24-C19-C20 | 122.118915             | 121.542713 | 122.089850 |
| 31      | H25-C19-C20 | 120.162807             | 120.682768 | 120.138410 |
| 32      | H25-C19-C24 | 117.718274             | 117.77450  | 117.771724 |
| 33      | C21-C20-C19 | 119.023390             | 119.054232 | 119.170654 |
| 34      | H26-C20-C19 | 119.577768             | 119.625834 | 119.396192 |
| 35      | H26-C20-C21 | 121.398703             | 121.319894 | 121.432867 |
| 36      | C22-C21-C20 | 119.605470             | 120.123716 | 119.448727 |
| 37      | O29-C21-C20 | 124.44570              | 124.033070 | 124.513281 |

|    |             |            |            |            |
|----|-------------|------------|------------|------------|
| 38 | O29-C21-C22 | 115.948826 | 115.843203 | 116.037968 |
| 39 | C23-C22-C21 | 121.315475 | 120.930392 | 121.370760 |
| 40 | H27-C22-C21 | 118.008643 | 118.098173 | 117.965445 |
| 41 | H27-C22-C23 | 120.675871 | 120.971428 | 120.663782 |
| 42 | C24-C23-C22 | 119.687473 | 119.543889 | 119.777293 |
| 43 | H28-C23-C22 | 119.896830 | 120.375117 | 119.889024 |
| 44 | H28-C23-C24 | 120.415688 | 120.080994 | 120.333678 |
| 45 | C19-C24-N17 | 112.337816 | 112.557855 | 112.511150 |
| 46 | C23-C24-N17 | 129.412912 | 128.637099 | 129.346254 |
| 47 | C23-C24-C19 | 118.249225 | 118.805035 | 118.142503 |
| 48 | C30-O29-C21 | 117.531692 | 118.725554 | 117.719955 |
| 49 | H31-C30-O29 | 106.204636 | 105.447533 | 106.035560 |
| 50 | H32-C30-O29 | 111.371175 | 110.983124 | 111.177804 |
| 51 | H32-C30-H31 | 109.351542 | 109.763175 | 109.453629 |
| 52 | H33-C30-O29 | 111.379953 | 111.020719 | 111.217687 |
| 53 | H33-C30-H31 | 109.350664 | 109.747429 | 109.405285 |
| 54 | H33-C30-H32 | 109.118828 | 109.792768 | 109.477523 |

## 2. Ground state dipole moment vs Excited state dipole moment

In the below **Table S7** we compared values of ground state dipole moment and excited state dipole moment that were obtained

**Table S7:-** Change in the ground state dipole moment and excited state dipole moment.

| Parameter                           | Method    | 6-31G** | 6-311G | 6-311G** |
|-------------------------------------|-----------|---------|--------|----------|
| Ground state dipole moment (Debye)  | B3LYP     | 4.1063  | 5.0075 | 4.2086   |
|                                     | M06-2X    | 4.1393  | 5.1103 | 4.2787   |
|                                     | M06L      | 3.9424  | 4.8456 | 3.9891   |
| Excited state dipole moment (Debye) | CAM-B3LYP | 4.8992  | 3.8138 | 4.9748   |
|                                     | M06-2X    | 5.0339  | 3.1548 | 5.0677   |
|                                     | M06L      | 4.6620  | 5.3179 | 4.6377   |

## 3. Ground to excited state transition electric dipole moments

### 3.1 CAM-B3LYP/6-31G\*\*

**Table S8:** - Ground to excited state transition electric dipole moments for CAM-B3LYP /6-31G\*\*.

| State | X       | Y       | Z       | Dip S. |
|-------|---------|---------|---------|--------|
| 1     | 0.9764  | -0.0234 | -3.0054 | 9.9866 |
| 2     | 0.0323  | 0.0436  | -0.0827 | 0.0098 |
| 3     | 0.0327  | 0.0001  | 0.1915  | 0.0377 |
| 4     | -0.5273 | 0.0059  | -0.5816 | 0.6163 |

|    |        |         |         |        |
|----|--------|---------|---------|--------|
| 5  | 0.0528 | -0.0003 | 0.2827  | 0.0827 |
| 6  | 0.0098 | -0.0840 | 0.0107  | 0.0073 |
| 7  | 0.8120 | -0.0175 | 0.1513  | 0.6825 |
| 8  | 0.6135 | -0.0003 | -0.7445 | 0.9307 |
| 9  | 0.3522 | -0.0069 | -0.0463 | 0.1262 |
| 10 | 0.3044 | 0.0017  | -0.0287 | 0.0935 |

### 3.2 CAM-B3LYP/6-311G

**Table S9:** - Ground to excited state transition electric dipole moments for CAM-B3LYP /6-311G.

| State | X       | Y       | Z       | Dip S.  |
|-------|---------|---------|---------|---------|
| 1     | -0.0104 | 0.0523  | 0.0377  | 0.0043  |
| 2     | 1.0272  | -0.0225 | -3.0382 | 10.2866 |
| 3     | -0.3993 | 0.0047  | -0.5174 | 0.4272  |
| 4     | -0.3717 | 0.0036  | -0.4246 | 0.3185  |
| 5     | 0.0034  | -0.0992 | 0.0045  | 0.0099  |
| 6     | 0.0405  | -0.0017 | 0.0149  | 0.0019  |
| 7     | 0.8135  | -0.0128 | -0.0843 | 0.6691  |
| 8     | 0.1404  | 0.0004  | -0.7647 | 0.6044  |
| 9     | 0.8522  | -0.0119 | -0.1721 | 0.7560  |
| 10    | 0.1328  | -0.0002 | 0.1475  | 0.0394  |

### 3.3 CAM-B3LYP/6-311G\*\*

**Table S10:** - Ground to excited state transition electric dipole moments for CAM-B3LYP/6-311G\*\*.

| State | X       | Y       | Z       | Dip S.  |
|-------|---------|---------|---------|---------|
| 1     | 0.9890  | -0.0220 | -3.0143 | 10.0646 |
| 2     | -0.0070 | 0.0403  | 0.0201  | 0.0021  |
| 3     | 0.0199  | -0.0019 | -0.1440 | 0.0211  |
| 4     | -0.5716 | 0.0035  | -0.4977 | 0.5745  |
| 5     | -0.0917 | -0.0024 | -0.3820 | 0.1543  |
| 6     | 0.0092  | 0.0771  | 0.0060  | 0.0061  |
| 7     | 0.8290  | -0.0101 | 0.1772  | 0.7188  |
| 8     | 0.6259  | -0.0133 | -0.7778 | 0.9969  |
| 9     | 0.1693  | -0.0007 | -0.0289 | 0.0295  |
| 10    | 0.3210  | -0.0110 | -0.0897 | 0.1112  |

### 3.4 M06-2X/6-31G\*\*

**Table S11:** - Ground to excited state transition electric dipole moments for M06-2X/6-31G\*\*.

| State | X      | Y       | Z       | Dip S. |
|-------|--------|---------|---------|--------|
| 1     | 0.9615 | -0.0192 | -2.9385 | 9.5593 |

|    |         |         |         |        |
|----|---------|---------|---------|--------|
| 2  | -0.0514 | 0.0449  | 0.1468  | 0.0262 |
| 3  | 0.0480  | -0.0011 | -0.2161 | 0.0490 |
| 4  | -0.4717 | 0.0044  | -0.3795 | 0.3665 |
| 5  | -0.2499 | -0.0001 | -0.6684 | 0.5091 |
| 6  | -0.0236 | -0.0818 | -0.0240 | 0.0078 |
| 7  | 0.8568  | -0.0017 | 0.0910  | 0.7424 |
| 8  | 0.5181  | -0.0163 | -0.7920 | 0.8958 |
| 9  | 0.1742  | 0.0029  | 0.0504  | 0.0329 |
| 10 | 0.0021  | -0.0050 | 0.0331  | 0.0011 |

### 3.5 M06-2X/6-311G

**Table S12:** - Ground to excited state transition electric dipole moments for M06-2X/6-311G.

| State | X       | Y       | Z       | Dip S. |
|-------|---------|---------|---------|--------|
| 1     | -0.0177 | 0.0455  | 0.0616  | 0.0062 |
| 2     | 0.9881  | -0.0219 | -2.9714 | 9.8059 |
| 3     | 0.1263  | -0.0014 | 0.4119  | 0.1856 |
| 4     | -0.4549 | 0.0081  | -0.7186 | 0.7234 |
| 5     | -0.0163 | -0.0791 | -0.0181 | 0.0069 |
| 6     | 0.0135  | -0.0020 | 0.2845  | 0.0811 |
| 7     | 0.8659  | -0.0115 | -0.0441 | 0.7519 |
| 8     | 0.3253  | -0.0018 | -0.7833 | 0.7195 |
| 9     | 0.5834  | -0.0081 | -0.1051 | 0.3515 |
| 10    | 0.2165  | 0.0010  | 0.0749  | 0.0525 |

### 3.6 M06-2X/6-311G\*\*

**Table S13:** - Ground to excited state transition electric dipole moments for M06-2X/6-311G\*\*.

| State | X       | Y       | Z       | Dip S. |
|-------|---------|---------|---------|--------|
| 1     | 0.9630  | -0.0197 | -2.9307 | 9.5167 |
| 2     | 0.0397  | 0.0433  | -0.1074 | 0.0150 |
| 3     | 0.0655  | -0.0031 | -0.1960 | 0.0427 |
| 4     | -0.4568 | 0.0011  | -0.3335 | 0.3198 |
| 5     | -0.2735 | -0.0021 | -0.7032 | 0.5694 |
| 6     | 0.0313  | -0.0821 | 0.0265  | 0.0084 |
| 7     | 0.8574  | -0.0193 | 0.0979  | 0.7451 |
| 8     | 0.5103  | 0.0002  | -0.7850 | 0.8766 |
| 9     | 0.1384  | -0.0054 | 0.0607  | 0.0229 |
| 10    | -0.0332 | 0.0036  | 0.0390  | 0.0026 |

### 3.7 M06L/6-31G\*\*

**Table S14:** - Ground to excited state transition electric dipole moments for M06L/6-31G\*\*.

| State | X       | Y       | Z       | Dip S.  |
|-------|---------|---------|---------|---------|
| 1     | 0.8388  | -0.0195 | -3.0559 | 10.0427 |
| 2     | -0.0001 | 0.0271  | 0.0015  | 0.0007  |
| 3     | -0.2624 | 0.0014  | -0.6530 | 0.4953  |
| 4     | 0.3421  | -0.0060 | -0.5839 | 0.4580  |
| 5     | 0.0772  | -0.0016 | -0.1139 | 0.0189  |
| 6     | 0.2606  | -0.0047 | -0.4695 | 0.2884  |
| 7     | 0.5206  | -0.0055 | 0.1601  | 0.2966  |
| 8     | -0.2030 | 0.0013  | 0.2617  | 0.1097  |
| 9     | 0.0066  | -0.0543 | -0.0082 | 0.0031  |
| 10    | -0.0012 | 0.0341  | 0.0008  | 0.0012  |

### 3.8 M06L/6-311G

**Table S15:** - Ground to excited state transition electric dipole moments for M06L/6-311G.

| State | X       | Y       | Z       | Dip S.  |
|-------|---------|---------|---------|---------|
| 1     | 0.8439  | -0.0203 | -3.1474 | 10.6184 |
| 2     | -0.0032 | 0.0335  | 0.0100  | 0.0012  |
| 3     | -0.4207 | 0.0046  | -0.2910 | 0.2617  |
| 4     | -0.0102 | -0.0008 | -0.1182 | 0.0141  |
| 5     | 0.1950  | -0.0037 | -0.3413 | 0.1545  |
| 6     | 0.3429  | -0.0073 | -0.6144 | 0.4951  |
| 7     | 0.0033  | 0.0825  | -0.0019 | 0.0068  |
| 8     | 0.4102  | -0.0034 | 0.2564  | 0.2340  |
| 9     | -0.4621 | 0.0067  | 0.2753  | 0.2893  |
| 10    | 0.0014  | 0.0245  | -0.0001 | 0.0006  |

### 3.9 M06L/6-311G\*\*

**Table S16:** - Ground to excited state transition electric dipole moments for M06L/6-311G\*\*.

| State | X       | Y       | Z       | Dip S.  |
|-------|---------|---------|---------|---------|
| 1     | 0.8389  | -0.0199 | -3.0524 | 10.0211 |
| 2     | 0.0005  | 0.0267  | -0.0002 | 0.0007  |
| 3     | -0.2554 | 0.0013  | -0.6610 | 0.5022  |
| 4     | 0.3458  | -0.0062 | -0.5816 | 0.4579  |
| 5     | 0.0778  | -0.0016 | -0.1091 | 0.0180  |
| 6     | 0.2598  | -0.0046 | -0.4651 | 0.2838  |
| 7     | 0.5187  | -0.0054 | 0.1658  | 0.2966  |
| 8     | -0.1793 | 0.0019  | 0.2533  | 0.0963  |
| 9     | -0.0039 | 0.0579  | 0.0048  | 0.0034  |
| 10    | -0.0009 | 0.0263  | -0.0002 | 0.0007  |
